# Supplementary material for: SMS education for the promotion of diabetes self-management in low & middle income countries: a pilot randomized controlled trial in Egypt
Source: PubMed Central journal article supplement (PMC5735794; doi:10.1186/s12889-017-4973-5), 2017-12-19
Supplement: 12889_2017_4973_MOESM1_ESM.pdf [file 12889_2017_4973_MOESM1_ESM.pdf]

## برنامج التوعية و المتابعة لمرضى السكر

### Diabetes Awareness Program Pre-study Questionnaire

#### معلومات عامة: (General Information)

Participant Number Name  
..... ٢. رقم المشترك: ..... ١. الاسم:

#### Body weight and random blood glucose level

..... ٣. الوزن و السكر العشوائي:

No Yes, at a rate of: Do you smoke?  
..... ٤. هل أنت مدخن؟  
لا  نعم، بمعدل:

No Yes Do you wish to quit smoking?  
..... ٥. هل ترغب في التوقف عن التدخين؟  
لا  نعم

#### التاريخ الطبي: (Medical History)

No Yes Are you hypertensive?  
..... ٦. هل أنت مريض ضغط؟  
لا  نعم

#### Other chronic diseases you suffer form:

..... ٧. أمراض مزمنة أخرى تعاني منها:

#### Other medications you regularly take:

..... ٨. أدوية أخرى تتناولها باستمرار:

#### How often do you visit the hospital's outpatients?

..... ٩. كم مرة تتردد علي عيادات المستشفى؟ أول مرة  اسبوعيا: ..... مرات  شهريا: ..... مرات  عند اللزوم  
Upon need monthly weekly first time

#### تاريخ السكر: (Diabetes History)

#### Current diabetes medications and medication times:

..... ١٠. أدوية السكر في الوقت الحالي و مواعيدها:

No Yes Insulin:  
..... ١١. انسولين:  
لا  نعم

#### Who do you see for your diabetes?

..... ١٢. مع من تتابع مرض السكر؟  أخصائي سكر  
باطني GP diabetes specialist

Where?  
١٣. أين تتابع مرض السكر؟  
 hospital's outpatients  
 Other clinics  
بعيادات المستشفى بعيادات أخرى

How often do you see your diabetes doctor?  
١٤. كم مرة تزور الطبيب بسبب السكر؟  
 Daily  
 weekly  
 monthly  
 upon need  
يوميًا: ..... مرات اسبوعيا: ..... مرات شهريا: ..... مرات عند اللزوم

Do you commit to seeing your doctor at preset times?<sup>1</sup>  
١٥. هل تلتزم بزيارة الطبيب في المواعيد المحددة؟  
 Always  
 Usually  
 50% of time  
 Sometimes  
 No  
دائما غالبا ٥٠% من الوقت أحيانا لا

In the last 3 months, how many times were you admitted to the ER or hospital because of your diabetes?<sup>2</sup>  
١٦. كم مرة قمت بزيارة غرفة الطوارئ (أو تم احتجازك بالمستشفى) بسبب السكر في الثلاث أشهر الماضية؟<sup>2</sup> ..... مرات

How often do you check your blood sugar?<sup>1,3</sup>  
١٧. كم مرة تقوم بقياس السكر؟<sup>1,3</sup>  
 daily  
 weekly  
 monthly  
 upon need  
 Do not check  
يوميًا: ..... مرات اسبوعيا: ..... مرات شهريا: ..... مرات عند اللزوم لا أقيس

Where do you check your blood sugar?  
١٨. أين تقوم بقياس السكر؟  
 Pharmacy  
 Lab  
 Glucometer at home  
بالمعمل الصيدلية يوجد جهاز قياس بالبيت

Do you record your results?<sup>1</sup>  
١٩. هل تقوم بتسجيل نتائج القياس؟<sup>1</sup>  
 Always  
 Usually  
 50% of time  
 Sometimes  
 No  
دائما غالبا ٥٠% من الوقت أحيانا لا

Why don't you check regularly?  
٢٠. لماذا لا تقيس لا يوجد تشجيع من العائلة لا تشعر بتحسن لا تشغول أو خارج البيت أسباب أخرى  
 I hate pricking myself  
 I don't feel better  
 Test cost  
 Bored or depressed  
 No support from family  
 busy/away from home  
 Other

Usual test result:  
٢١. النتيجة المعتادة لتحليل السكر: صائم (قبل الأكل) ..... فاطر (بعد الأكل بساعتين) ..... عشوائي .....  
 fasting  
 2-hrs postprandial  
 Random

**Result** **Date** **Have you recently taken the HbA1c test?**  
..... النتيجة: ..... التاريخ: ..... هل قمت مؤخرا بعمل تحليل الهيموجلوبين السكري؟<sup>٢٢</sup>

**Do you take your medications/insulin on time?**<sup>1</sup>

٢٣. هل أنت منتظم في مواعيدك<sup>1</sup>  
الدواء أو الانسولين؟  
 لا  دائما  غالبا  ٥٠% من الوقت  أحيانا  لا  
**No** **Sometimes** **50% of time** **Usually** **Always**

**Excluding times you forget, are you sometimes careless taking your medicine/insulin?**<sup>4</sup>

٢٤. عدا النسيان، هل تهمل أحيانا في تناول الدواء أو الانسولين؟<sup>4</sup> نعم  لا   
**No** **Yes**

**At what rate do you miss taking your medications on time?**

٢٥. بأي معدل تكون غير منتظم  
في تناول الدواء في مواعيده؟  
 يوميا: ..... مرات  اسبوعيا: ..... مرات  شهريا: ..... مرات  
**Monthly** **weekly** **daily**

**What makes you miss taking your medications on time?**

٢٦. ما الذي يجعلك  أعراض جانبية  لا تشعر بتحسن  
غير منتظم؟  لا يوجد تشجيع من العائلة  سعر الدواء  
 أسباب أخرى .....  
**Busy/away from home** **I don't feel better** **side effects**  
**Bored or depressed** **price of medication** **no support from family**  
**Other**

**Do you sometimes forget taking your medication/insulin?**<sup>4</sup>

٢٧. هل تنسى تناول الدواء أو الانسولين؟<sup>4</sup> نعم  لا   
**No** **Yes**

**Do you take the right insulin dose?**<sup>1</sup>

٢٨. هل تأخذ الجرعة الصحيحة<sup>1</sup>  
للانسولين؟  
 لا  دائما  غالبا  ٥٠% من الوقت  أحيانا  لا  
**No** **Sometimes** **50% of time** **Usually** **Always**

**Do you adjust your insulin dose based on your blood sugar measurements?**<sup>1</sup>

٢٩. هل تعدل جرعة الانسولين<sup>1</sup>  
بناء على قياسات السكر؟  
 لا  دائما  غالبا  ٥٠% من الوقت  أحيانا  لا  
**No** **Sometimes** **50% of time** **Usually** **Always**

**Do you suffer from any medication side effects?**

٣٠. هل تعاني من الآثار الجانبية للدواء؟  نعم. مثل ماذا؟ .....  
 لا  
**No** **Yes, e.g.:**

- Are you aware of your medications' side effects?**<sup>5</sup>  
٣١. هل أنت علي معرفة بالأعراض الجانبية لدواء السكر الذي تتناوله؟<sup>5</sup>  
No  لا Yes  نعم
- Do you stop your medication/insulin when not feeling well?**<sup>4</sup>  
٣٢. هل تتوقف عن تناول الدواء أو الانسولين عندما تشعر بسوء؟<sup>4</sup>  
No  لا Yes  نعم
- Do you stop your medication/insulin when feeling better?**<sup>4</sup>  
٣٣. هل تتوقف عن تناول الدواء أو الانسولين عندما تشعر بتحسن؟<sup>4</sup>  
No  لا Yes  نعم
- Are you aware of diabetes complications?**<sup>5</sup>  
٣٤. هل أنت علي علم بالأضرار الناتجة عن إهمال مرض السكر؟<sup>5</sup>  
No  لا Yes  نعم
- Are you aware of diabetes follow up tests and their times?**<sup>5</sup>  
٣٥. هل تعلم ما هي التحاليل المطلوبة لمتابعة مرض السكر و مواعيدها؟<sup>5</sup>  
No  لا Yes  نعم

- Do you take these tests regularly?**<sup>1</sup>  
٣٦. هل أنت منتظم في عمل تلك التحاليل؟<sup>1</sup>  
No  لا Sometimes  أحيانا 50% of time  غالبا Usually  دائما Always  ٥٠ % من الوقت

- Have you taken any of the following tests?**  
٣٧. هل قمت بعمل تلك التحاليل و الفحوصات؟  
Lipid profile  دهون في الدم  
eye exam  فحص قاع عين  
urine test  تحليل بول  
kidney function  وظائف كلي

**When were your last tests and how were the results?**  
٣٨. متي و كيف كانت نتيجة آخر فحص؟  
.....

**Date of last dental visit:** تاريخ آخر زيارة لطبيب الأسنان: .....

**Do you suffer from teeth problems?**  
٣٩. هل تعاني من مشاكل في الأسنان؟  
.....

- Do you check your feet?**  
٤٠. هل تقوم بفحص قدميك؟  
No  لا Yes, at doctor's  نعم عند الطبيب Yes, myself  نعم بنفسي

**How often do you check your feet?**  
٤١. كم مرة تقوم بفحص قدميك؟  
upon need  عند اللزوم monthly  شهريا: ..... مرات weekly  اسبوعيا: ..... مرات Daily  يوميا: ..... مرات

**Are you aware of the type of diabetes you have?**<sup>5</sup>  
٤٢. ما نوع السكر الذي تعاني منه؟<sup>5</sup>  
Not sure  غير متأكد type 2  النوع الثاني type 1  النوع الاول

**How do you think diabetes (will) affect(s) your daily life?**  
٤٣. كيف يؤثر (أو تعتقد أن يؤثر) مرض السكر علي حياتك اليومية؟  
.....

**What difficulties do you (think you will) experience monitoring your diabetes?**

٤٤. ما هي الصعوبات التي تجدها (أو تعتقد أنك ستجدها) لمتابعة مرض السكر؟ .....

**Did you suffer a diabetic coma in the last 3 months?**  
٤٥. هل سبق أن أصبت بغيبوبة سكر في الثلاث أشهر الماضية؟  
Yes  نعم No  لا

**Do you suffer any eye, foot, kidney or heart complications?**

٤٦. هل تعاني من مضاعفات لمرض السكر مثل مشاكل في القدم أو العين أو الكلي أو القلب؟ .....

**Does someone at home help you take care of your diabetes?**

٤٧. هل يساعدك من في البيت في العناية بمرض السكر؟ .....

**Have you received instructions on how to take care of your diabetes? When and where?**

٤٨. هل تلقيت تعليمات في السابق عن مرض السكر أو العناية به؟ متي و أين؟ .....

**How do you rate your diabetes awareness level?** <sup>5</sup>  
٤٩. ما مدي معلوماتك عن السكر و العناية به؟  
Weak  ضعيف fair  مقبول aware  واعي

**How do you feel about having diabetes?**

٥٠. كيف تشعر و أنت مريض سكر؟ .....

**What do you wish to learn about diabetes?**

٥١. ما الذي تحب أن تعرفه عن مرض السكر؟  
 النظام الغذائي  الرياضة  الأدوية و مضاعفتها  
 قياس السكر  معلومات أخرى .....

**Medications & side effects** **physical activity** **healthy diet**  
**Other info** **blood glucose measurement**

**Are you satisfied with your control of your diabetes and blood sugar levels?**

٥٢. هل أنت راض عن تحكمك في السكر و نسيه؟ .....

**In the last 3 months, did you suffer extreme increase or decrease in your blood sugar levels?**

٥٣. هل عانيت من الارتفاع أو الانخفاض الشديد لنسب السكر في الثلاث أشهر الماضية؟  
Daily  يوميا: ..... مرات  اسبوعيا: ..... مرات  شهريا: ..... مرات  غير متأكد  لا  
Daily **weekly** **monthly** **not sure** **No**

**What did you do at times of increase or decrease of your blood sugar levels?** <sup>5</sup>

٥٤. ماذا تفعل في حالة الارتفاع أو الانخفاض؟<sup>5</sup> .....

**What is your biggest concern about monitoring your diabetes?**

٥٥. ما هو أكثر ما يقلقك من السكر و متابعته؟ .....

## الغذاء: (Diet)

Are you aware of the healthy diet for diabetics?<sup>5</sup>

لا

٥٦. هل تعلم ما هو النظام الغذائي الصحي لمرضى السكر؟<sup>5</sup>  نعم

No

Yes

Do you follow it?<sup>1</sup>

لا

أحيانا

٥٠ % من الوقت

غالبا

دائما

٥٧. هل تتبعه؟<sup>1</sup>

No

Sometimes

50% of time

Usually

Always

No

لا

Yes

نعم

Are you comfortable with your body weight?

٥٨. هل أنت مرتاح بوزنك الحالي؟

No

لا

Yes

نعم

Did your weight change in the last year?

٥٩. هل تغير وزنك في السنة الماضية؟

How many meals do you have per day?

٦٠. كم وجبة تتناول في اليوم؟  
.....

What types of meals and at what times do you have them?

٦١. ما هي نوعية الوجبات و مواعيدها؟  
.....

Do you commit to the preset meal times?<sup>1</sup>

٦٢. هل تلتزم بالمواعيد المحددة<sup>1</sup>

لا

أحيانا

٥٠ % من الوقت

غالبا

دائما

ل للوجبات؟

No

Sometimes

50% of time

Usually

Always

Do you regularly eat snacks between main meals?<sup>1</sup>

٦٣. هل تتناول شئ ما بين الوجبات الأساسية؟  
.....

لا

أحيانا

٥٠ % من الوقت

غالبا

دائما

بمواعيد منتظمة؟<sup>1</sup>

No

Sometimes

50% of time

Usually

Always

Do you carry something sweet as you leave home?<sup>1</sup>

٦٤. هل تأخذ معك شئ من السكريات<sup>1</sup>

لا

أحيانا

٥٠ % من الوقت

غالبا

دائما

عند الخروج من البيت؟

No

Sometimes

50% of time

Usually

Always

Do you eat out?

٦٥. هل تأكل خارج البيت؟

لا

شهريا: ..... مرات

اسبوعيا: ..... مرات

يوميا: ..... مرات

No

monthly

weekly

Daily

### Do you drink canned juices or sodas?

٦٦. هل تشرب المشروبات الغازية و العصائر؟  
 لا  يوميا: ..... مرات  اسبوعيا: ..... مرات  شهريا: ..... مرات  No  monthly  weekly  Daily

### الرياضة / الحركة: (Exercise)

### Do you regularly exercise or exert any physical activity?<sup>1,6</sup>

٦٧. هل تمارس الرياضة<sup>1,6</sup> أو الحركة بانتظام؟  
 لا  يوميا: ..... مرات  اسبوعيا: ..... مرات  شهريا: ..... مرات  عند اللزوم  No  upon need  monthly  weekly  Daily

### Why not?

٦٨. لم لا؟  
 لا تشعر بتحسن  مشغول أو خارج البيت  لا يوجد تشجيع من العائلة  
 عندما أشعر بالاكنتئاب أو الملل  أشعر بالألم و عدم الارتياح  
 أسباب أخرى  
No support from family    busy/away from home    I don't feel better  
Pain or discomfort    bored or depressed  
Other

### What kind of exercise do you do? Do you walk 30mins a day?<sup>6</sup>

٦٩. ما نوع الرياضة التي تمارسها؟ هل تمارس المشي ٣٠ دقيقة يوميا؟<sup>6</sup>

### Do you exercise strenuously?<sup>1</sup>

٧٠. هل تمارس الرياضة<sup>1</sup> أو الحركة بكثافة؟  
 لا  دائما  غالبا  ٥٠ % من الوقت  أحيانا  No  Sometimes  50% of time  Usually  Always

### Does your health condition affect your ability to be physically active?

٧١. هل تؤثر حالتك الصحية علي قدرتك علي الحركة؟

### Are you aware of exercise benefits for diabetics?<sup>5</sup>

٧٢. هل تعلم فوائد الرياضة لمرضي السكر؟<sup>5</sup>  
 لا  نعم  
No    yes

### معلومات اجتماعية: (Social information)

### Can you afford the costs of treatment?

٧٣. هل تستطيع التكفل بمستلزمات العلاج من أدوية. غذاء، الخ؟  
 لا  نعم  
No    yes

**الثقة في القيام بالأشياء: (Confidence in doing things)**

ما مدى ثقتك في: How confident are you to:

**Eat every 4-5 hrs?** <sup>7</sup>  
٧٤. أن تأكل الوجبات كل ٥-٤ ساعات؟  
 كاملة  عالية  متوسطة  قليلة  منعدمة

**Commit to your meal plan even when eating with non-diabetics?** <sup>7</sup>  
٧٥. أن تلتزم بالنظام الغذائي عندما تأكل مع  
آخرين غير مصابين بالسكر؟  
 كاملة  عالية  متوسطة  قليلة  منعدمة

**Pick the right type of food when feeling hungry (e.g. between meals)?** <sup>7</sup>  
٧٦. اختيارك لنوع الأكل المناسب عندما  
تشعر بالجوع (ما بين الوجبات مثلا)؟  
 كاملة  عالية  متوسطة  قليلة  منعدمة

**Exercise 30 mins/day?** <sup>7</sup>  
٧٧. قدرتك علي الرياضة أو الحركة  
٣٠ دقيقة يوميا؟  
 كاملة  عالية  متوسطة  قليلة  منعدمة

**Do what's right to keep your blood sugar level from dropping during exercise?** <sup>7</sup>  
٧٨. قدرتك علي فعل شيء حتي لا  
ينخفض سكرك مع المجهود؟  
 كاملة  عالية  متوسطة  قليلة  منعدمة

**Know what you need to do when your blood sugar level is higher or lower than normal?** <sup>7</sup>  
٧٩. معرفتك لما عليك فعله عند ارتفاع أو  
انخفاض سكرك عن المعدل الطبيعي؟  
 كاملة  عالية  متوسطة  قليلة  منعدمة

**Know when you must see your doctor?** <sup>7</sup>  
٨٠. معرفة متي يتوجب عليك زيارة  
الطبيب؟  
 كاملة  عالية  متوسطة  قليلة  منعدمة

**Control your diabetes so that it doesn't stop you from doing anything you like?** <sup>7</sup>  
٨١. قدرتك في التحكم في السكر حتي  
لا يمنحك من القيام بما تحب أن تفعل؟  
 كاملة  عالية  متوسطة  قليلة  منعدمة

**Control your diabetes and avoid its complications?**  
٨٢. قدرتك في التحكم في السكر حتي  
لا تصاب بمضاعفاته؟  
 كاملة  عالية  متوسطة  قليلة  منعدمة

**Let your doctor monitor your diabetes?** <sup>8</sup>  
٨٣. متابعة الطبيب لسكرك؟  
 كاملة  عالية  متوسطة  قليلة  منعدمة

**How do you rate your level of satisfaction with your doctor monitoring your diabetes?** <sup>9</sup>

٨٤. ما مدى رضائك عن متابعة  
الطبيب لسكرك؟  
 كامل  عالي  متوسط  قليل  منعدم  
**full high moderate slight None**

**How do you rate your level of satisfaction with your doctor's communication with you?** <sup>9</sup>

٨٥. ما مدى رضائك عن تواصل  
الطبيب معك؟  
 كامل  عالي  متوسط  قليل  منعدم



None      slight      moderate      high      full

If you are to receive the SMS messages, when would you prefer to get them?

٦. ان كنت ضمن المستلمين للرسائل.

في أي وقت تفضل أن تستلمها؟  
 صباحا       ظهرا       مساء  
morning      noon      Evening

Date

التاريخ: .....

Signature

التوقيع: .....

**Superscripted questions are to rate the following:**

- <sup>1</sup> treatment adherence (using the diabetes self-care inventory)
- <sup>2</sup> rate of hospital/ER visits and stays
- <sup>3</sup> average frequency of blood glucose measurement
- <sup>4</sup> medication adherence (using Morisky scale)
- <sup>5</sup> diabetes knowledge
- <sup>6</sup> exercise
- <sup>7</sup> patient confidence (using diabetes empowerment scale short form and Stanford self-efficacy for diabetes)
- <sup>8</sup> patient confidence in healthcare provider
- <sup>9</sup> patient satisfaction

## برنامج التوعية و المتابعة لمرضى السكر

### Diabetes Awareness Program Post-study Questionnaire

#### معلومات عامة: (General Information):

Participant Number Name  
..... ٢. رقم المشترك: ..... ١. الاسم:

#### Body weight and random blood glucose level

..... ٣. الوزن و السكر العشوائي: و .....

**\*\*\*\*\* في الثلاث أشهر الماضية (منذ بدء البرنامج) \*\*\*\*\***

#### In the last 3 months (since start of program):

No Yes, I reduced by: Yes, I stopped Did you stop or reduce smoking?  
..... ٤. للمدخنين: هل توقفت عن أو خفضت معدل التدخين؟  نعم توقفت  نعم خفضت بمعدل: .....  لا

#### (Medical History): التاريخ الطبي:

#### Were you diagnosed with other chronic disorders?

..... ٥. هل شخصت بأمراض مزمنة أخرى؟

#### (Diabetes History): تاريخ السكر:

#### Did you switch from pills to insulin?

..... ٦. هل حولت من حبوب لانسولين؟  نعم  لا  
No yes

#### How often did you see your diabetes doctor?

..... ٧. كم مرة قمت بزيارة الطبيب بسبب السكر؟  
..... مرات  يوميا: ..... مرات  اسبوعيا: ..... مرات  شهريا: ..... مرات  عند اللزوم  
upon need monthly weekly Daily

#### Did you commit to seeing your doctor at preset times? <sup>1</sup>

..... ٨. هل التزمت بزيارة الطبيب <sup>1</sup> في المواعيد المحددة؟  دائما  غالبا  ٥٠% من الوقت  أحيانا  لا  
No Sometimes 50% of time Usually Always

#### How many times were you admitted to the ER or hospital because of your diabetes? <sup>2</sup>

..... ٩. كم مرة قمت بزيارة غرفة الطوارئ (أو تم احتجازك بالمستشفى) بسبب السكر؟ <sup>2</sup> مرات

### How often did you check your blood sugar?<sup>1,3</sup>

١٠. كم مرة قمت بقياس<sup>1,3</sup>

السكر؟  يوميا: ..... مرات  اسبوعيا: ..... مرات  شهريا: ..... مرات  عند اللزوم  لم أقيس

Did not check upon need

monthly

weekly

daily

### Where did you check your blood sugar?

١١. أين قمت بقياس السكر؟  بالمعمل  بالصيدلية  يوجد جهاز قياس بالبيت

Glucometer at home

Lab

Pharmacy

### Did you record your results?<sup>1</sup>

١٢. هل قمت بتسجيل نتائج القياس؟<sup>1</sup>  دائما  غالبا  ٥٠% من الوقت  أحيانا  لا

No

Sometimes

50% of time

Usually

Always

### Why didn't you check regularly?

١٣. لماذا لم تقيس  لا يوجد تشجيع من العائلة  أكره شك نفسي  سعر التحليل  السكر باستمرار؟  مشغول أو خارج البيت  لا تشعر بتحسن  عندما أشعر بالاكنتاب أو الملل  أسباب أخرى .....

Test cost  
Bored or depressed

I hate pricking myself  
I don't feel better

No support from family  
busy/away from home

Other

### Usual test result:

١٤. النتيجة المعتادة لتحليل السكر: صائم (قبل الأكل) ..... فاطر (بعد الأكل بساعتين) ..... عشوائي .....

Random

2-hrs postprandial

fasting

### Did you take your medications/insulin on time?<sup>1</sup>

١٥. هل انتظمت في مواعيد<sup>1</sup>

الدواء أو الانسولين؟  دائما  غالبا  ٥٠% من الوقت  أحيانا  لا

No

Sometimes

50% of time

Usually

Always

### Excluding times you forgot, were you sometimes careless taking your medicine/insulin?<sup>4</sup>

١٦. عدا النسيان، هل أهملت أحيانا في تناول الدواء أو الانسولين؟<sup>4</sup>  نعم  لا

No

Yes

### At what rate did you miss taking your medications on time?

١٧. بأي معدل كنت غير منتظم

في تناول الدواء في مواعيده؟  يوميا: ..... مرات  اسبوعيا: ..... مرات  شهريا: ..... مرات

Monthly

weekly

daily

### What made you miss taking your medications on time?

١٨. ما الذي جعلك  أعراض جانبية  لا تشعر بتحسن  مشغول أو خارج البيت  غير منتظم؟  لا يوجد تشجيع من العائلة  سعر الدواء  عندما أشعر بالاكنتاب أو الملل

..... أسباب أخرى   
**Busy/away from home** **I don't feel better** **side effects**  
**Bored or depressed** **price of medication** **no support from family**  
**Other**

**Did you sometimes forget taking your medication/insulin?<sup>4</sup>**

لا  نعم  <sup>١٩. هل نسيت أحيانا تناول الدواء أو الانسولين؟<sup>4</sup></sup>  
**No** **Yes**

**Did you take the right insulin dose?<sup>1</sup>**

لا  أحيانا  ٥٠ % من الوقت  غالبا  دائما  <sup>٢٠. هل أخذت الجرعة الصحيحة<sup>1</sup> للانسولين؟</sup>  
**No** **Sometimes** **50% of time** **Usually** **Always**

**Did you adjust your insulin dose based on your blood sugar measurements?<sup>1</sup>**

لا  أحيانا  ٥٠ % من الوقت  غالبا  دائما  <sup>٢١. هل عدلت جرعة الانسولين<sup>1</sup> بناء علي قياسات السكر؟</sup>  
**No** **Sometimes** **50% of time** **Usually** **Always**

**Did you become aware of the side effects of your medications?<sup>5</sup>**

لا  نعم  <sup>٢٢. هل تعرفت علي الأعراض الجانبية لدواء السكر الذي تتناوله؟<sup>5</sup></sup>  
**No** **Yes**

**Did you stop your medication/insulin when you were not feeling well?<sup>4</sup>**

لا  نعم  <sup>٢٣. هل توقفت عن تناول الدواء أو الانسولين عند الشعور بسوء؟<sup>4</sup></sup>

**Did you stop your medication/insulin when you felt better?<sup>4</sup>**

لا  نعم  <sup>٢٤. هل توقفت عن تناول الدواء أو الانسولين عند الشعور بتحسن؟<sup>4</sup></sup>

**Did you become more aware of diabetes complications?<sup>5</sup>**

لا  نعم  <sup>٢٥. هل أصبحت أكثر علما بالأضرار الناتجة عن إهمال مرض السكر؟<sup>5</sup></sup>

**Did you become more aware of diabetes follow up tests and their times?<sup>5</sup>**

لا  نعم  <sup>٢٦. هل أصبحت أكثر علما بالتحاليل المطلوبة لمتابعة مرض السكر و مواعيدها؟<sup>5</sup></sup>

**Did you take these tests regularly?<sup>1</sup>**

لا  أحيانا  ٥٠ % من الوقت  غالبا  دائما  <sup>٢٧. هل إنتظمت في عمل تلك التحاليل؟<sup>1</sup></sup>  
**No** **Sometimes** **50% of time** **Usually** **Always**

**Did you take any of the following tests?**

لا  فحص قاع عين  تحليل بول  وظائف كلي  <sup>٢٨. هل قمت بعمل تلك التحاليل و الفحوصات؟</sup>  
**Lipid profile** **eye exam** **urine test** **kidney function**

**When were your last tests and how were the results?**

..... متي و كيف كانت نتيجة أخر فحص؟<sup>٢٩</sup>

**Did you see your dentist?**  
٣٠. هل قمت بزيارة طبيب الأسنان؟  
No  لا Yes  نعم .....

**Did you check your feet?**  
٣١. هل قمت بفحص قدميك؟  نعم بنفسي  
No  لا Yes, at doctor's  نعم عند الطبيب  
Yes, myself

**How often did you check your feet?**  
٣٢. كم مرة قمت بفحص قدميك؟  
Daily  يوميا: ..... مرات  
weekly  اسبوعيا: ..... مرات  
monthly  شهريا: ..... مرات  
upon need  عند اللزوم

**Did you become aware of the type of diabetes you have? <sup>5</sup>**  
٣٣. هل أصبحت علي علم بنوع السكر الذي تعاني منه؟ <sup>5</sup>  
type 1  النوع الاول type 2  النوع الثاني Not sure  غير متأكد

**You told us about the effect of diabetes on your daily life. Did it get better?**  
٣٤. أخبرتنا بتأثير السكر علي حياتك اليومية.  
هل من تحسن؟  
Yes  نعم Slightly  قليل Somewhat  بعض الشيء No  لا Had no problem  لم توجد مشكلة

**You told us about difficulties you experienced monitoring your diabetes? Did they get better?**  
٣٥. أخبرتنا ببعض الصعوبات لمتابعة السكر.  
هل من تحسن؟  
Yes  نعم Slightly  قليل Somewhat  بعض الشيء No  لا Had no problem  لم توجد مشكلة

**Did you suffer a diabetic coma?**  
٣٦. هل أصبت بغيوبة سكر؟  
Yes  نعم No  لا

**You mentioned suffering some eye, foot, kidney or heart complications. Did they get better?**  
٣٧. أخبرتنا ببعض المضاعفات في العين، القدم، الكلي أو القلب.  
هل من تحسن؟  
Yes  نعم Slightly  قليل Somewhat  بعض الشيء No  لا Had no problem  لم توجد مشكلة

**Did someone at home help you take care of your diabetes?**  
٣٨. هل ساعدك من في البيت في العناية بمرض السكر؟ .....

**How do you rate your diabetes awareness level now? <sup>5</sup>**  
٣٩. كيف أصبح مستوي معلوماتك عن السكر؟ <sup>5</sup>  
aware  واعي Weak  ضعيف  
fair

**Did your knowledge about diabetes and how to care for it improve?**

٤٠. هل شعرت بتحسين معلوماتك عن السكر و العناية به؟  
 نعم  بعض الشيء  قليل  غير متأكد  لا  لم أقرأ  
Did not read No not sure slightly somewhat yes  
SMS or booklet

**You told us about the way you felt about having diabetes. Did it get better?**

٤١. أخبرتنا بشعورك و أنت مريض سكر.  
هل من تحسن؟  
 نعم  بعض الشيء  قليل  غير متأكد  لا  لم توجد مشكلة  
Had no problem No not sure slightly somewhat yes

**You told us about some things you wished to learn about diabetes. Were we able to give you such information?**

٤٢. أخبرتنا بما تحب أن تعرفه عن السكر. هل نجحنا في توصيل المعلومات اليك؟  
 نعم  بعض الشيء  قليل  غير متأكد  لا  لم أقرأ  
Did not read No not sure slightly somewhat yes  
SMS or booklet

**Were you satisfied with your control of your diabetes and your blood sugar levels?**

٤٣. هل كنت راض عن تحكمك في السكر و نسبه؟  
.....

**Did you suffer extreme increase or decrease in your blood sugar levels?**

٤٤. هل عانيت من الارتفاع أو الانخفاض الشديد لنسب السكر؟  
 يوميًا: ..... مرات  اسبوعيا: ..... مرات  شهريا: ..... مرات  غير متأكد  لا  
No not sure monthly weekly Daily

**What did you do at times of increase or decrease of your blood sugar levels? <sup>5</sup>**

٤٥. ماذا كنت تفعل في حالة الارتفاع أو الانخفاض؟ <sup>5</sup>  
.....

**You told us about your biggest worries monitoring your diabetes. Did it get better?**

٤٦. أخبرتنا بأكثر ما يقلقك من السكر و متابعته.  
هل من تحسن؟  
 نعم  بعض الشيء  قليل  غير متأكد  لا  لم توجد مشكلة  
Had no problem No not sure slightly somewhat yes

**الغذاء: (Diet)**

**Did you become aware of the healthy diet for diabetics? <sup>5</sup>**

٤٧. هل تعرفت علي النظام الغذائي الصحي لمرضي السكر؟ <sup>5</sup> نعم  لا   
No Yes

**Did you follow it? <sup>1</sup>**

٤٨. هل اتبعته؟ <sup>1</sup>  
 دائما  غالبا  ٥٠ % من الوقت  أحيانا  لا  
No Sometimes 50% of time Usually Always

### Did your body weight change?

٤٩. هل تغير وزنك؟  نعم أكثر راحة  نعم أقل راحة  لا

Yes, more comfortable Yes, less comfortable No

### How many meals did you have per day?

٥٠. كم وجبة تناولت في اليوم؟ .....

### What types of meals and at what times did you have them?

٥١. ما هي نوعية الوجبات و مواعيدها؟  خطة غذاء  صحي  كميات كبيرة  مواعيد ثابتة

كل (أي) حاجة  غير صحي  كميات معتدلة  مواعيد متغيرة

meal plan healthy big portions regular times  
every (any) thing Unhealthy moderate portions irregular times

### Did you commit to the preset meal times? <sup>1</sup>

٥٢. هل التزمت بالمواعيد المحددة <sup>1</sup> للوجبات؟

دائما  غالبا  ٥٠% من الوقت  أحيانا  لا

Always Usually 50% of time Sometimes No

### Did you regularly eat snacks between main meals? <sup>1</sup>

٥٣. هل تناولت شئ ما بين الوجبات الأساسية؟ <sup>1</sup> بمواعيد منتظمة؟

دائما  غالبا  ٥٠% من الوقت  أحيانا  لا

Always Usually 50% of time Sometimes No

### Did you carry something sweet as you left home? <sup>1</sup>

٥٤. هل أخذت معك شئ من السكريات <sup>1</sup> عند الخروج من البيت؟

دائما  غالبا  ٥٠% من الوقت  أحيانا  لا

Always Usually 50% of time Sometimes No

### Did you eat out?

٥٥. هل أكلت خارج البيت؟  يوميا: ..... مرات  اسبوعيا: ..... مرات  شهريا: ..... مرات

Daily weekly monthly No

### Did you drink canned juices or sodas?

٥٦. هل شربت المشروبات الغازية أو العصائر؟  يوميا: ..... مرات  اسبوعيا: ..... مرات  شهريا: ..... مرات

Daily weekly monthly No

### الرياضة / الحركة: (Exercise)

### Did you regularly exercise or exert any physical activity? <sup>1,6</sup>

٥٧. هل مارست الرياضة <sup>1,6</sup> أو الحركة بانتظام؟  يوميا: ..... مرات  اسبوعيا: ..... مرات  شهريا: ..... مرات  عند اللزوم  لا

No upon need monthly weekly Daily

Why not?

لا تشعر بتحسن  مشغول أو خارج البيت  لا يوجد تشجيع من العائلة   
عندما أشعر بالاكنتئاب أو الملل  أشعر بالألم و عدم الارتياح   
أسباب أخرى .....

No support from family Pain or discomfort busy/away from home I don't feel better bored or depressed Other

What kind of exercise did you do? Did you walk 30mins a day as we instructed? <sup>6</sup>

٥٩. ما نوع الرياضة التي مارستها؟ هل مارست المشي ٣٠ دقيقة يوميا كما نصحناك؟ <sup>6</sup>

Did you exercise strenuously? <sup>1</sup>

٦٠. هل مارست الرياضة <sup>1</sup>

أو الحركة بكثافة؟  دائما  غالبا  ٥٠ % من الوقت  أحيانا  لا   
No Sometimes 50% of time Usually Always

Did you become aware of exercise benefits for diabetics? <sup>5</sup>

٦١. هل تعرفت علي فوائد الرياضة لمرضي السكر؟ <sup>5</sup>  نعم  لا   
No yes

الثقة في القيام بالأشياء: (Confidence in doing things)

كيف أصبحت ثقتك في: How confident were you to:

Not at all slightly moderately highly fully Eat every 4-5 hrs? <sup>7</sup>  
٦٢. أن تأكل الوجبات كل ٤-٥ ساعات؟  كاملة  عالية  متوسطة  قليلة  منعدمة

Commit to your meal plan even when eating with non-diabetics? <sup>7</sup>

٦٣. أن تلتزم بالنظام الغذائي عندما تأكل مع <sup>7</sup>  
اخرين غير مصابين بالسكر؟  كاملة  عالية  متوسطة  قليلة  منعدمة

Pick the right type of food when feeling hungry (e.g. between meals)? <sup>7</sup>

٦٤. اختيارك لنوع الأكل المناسب عندما <sup>7</sup>  
تشعر بالجوع (ما بين الوجبات مثلا)؟  كاملة  عالية  متوسطة  قليلة  منعدمة

Exercise 30 mins/day? <sup>7</sup>

٦٥. قدرتك علي الرياضة أو الحركة <sup>7</sup>  
٣٠ دقيقة يوميا؟  كاملة  عالية  متوسطة  قليلة  منعدمة

Do what's right to keep your blood sugar level from dropping during exercise? <sup>7</sup>

٦٦. قدرتك علي فعل شيء حتي لا <sup>7</sup>  
ينخفض سكرك مع المجهود؟  كاملة  عالية  متوسطة  قليلة  منعدمة

Know what you need to do when your blood sugar level is higher or lower than normal? <sup>7</sup>



٦٧. معرفتك لما عليك فعله عند ارتفاع أو <sup>7</sup> انخفاض سكرك عن المعدل الطبيعي؟  
 كاملة  عالية  متوسطة  قليلة  منعدمة

**Know when you must see your doctor? <sup>7</sup>**

٦٨. معرفة متي يتوجب عليك زيارة <sup>7</sup> الطبيب؟  
 كاملة  عالية  متوسطة  قليلة  منعدمة

**Control your diabetes so that it doesn't stop you from doing anything you like? <sup>7</sup>**

٦٩. قدرتك في التحكم في السكر حتي <sup>7</sup> لا يمنعك من القيام بما تحب أن تفعل؟  
 كاملة  عالية  متوسطة  قليلة  منعدمة

**Control your diabetes and avoid its complications?**

٧٠. قدرتك في التحكم في السكر حتي لا تصاب بمضاعفاته؟  
 كاملة  عالية  متوسطة  قليلة  منعدمة

**Let the hospital monitor your diabetes? <sup>8</sup>**

٧١. متابعة المستشفى لسركك؟ <sup>8</sup>  
 كاملة  عالية  متوسطة  قليلة  منعدمة

**How do you rate your level of satisfaction with the hospital monitoring your diabetes? <sup>9</sup>**

٧٢. مدي رضاك عن متابعة <sup>9</sup> المستشفى لسركك؟  
 كامل  عالي  متوسط  قليل  منعدم  
None slight moderate high full

**How do you rate your level of satisfaction with our communication with you? <sup>9</sup>**

٧٣. مدي رضاك عن تواصلنا <sup>9</sup> معك؟  
 كامل  عالي  متوسط  قليل  منعدم  
None slight moderate high full

**رأيك في البرنامج: (Your opinion of the program)**

**How did you feel being part of the program?**

٧٤. كيف كان شعورك و أنت عضو في البرنامج؟  
.....

**Did you get the messages every day?**  
٧٥. هل وصلتك الرسائل يوميا؟  
Yes  نعم  لا، لم لا؟  No, why not?  
.....

**Were the SMS receipt times convenient?**  
٧٦. هل كان وقت استلام الرسائل مناسبا؟  
Yes  نعم  لا، لم لا؟  No, why not?  
.....

**Was the content clear and understandable?**  
٧٧. هل كان المحتوى واضح و مفهوم؟  
Yes  نعم  بعض الشيء  لا، لم لا؟  No  
Somewhat

**Did you experience any difficulty reading and understanding the messages?**

٧٨. هل واجهتك صعوبة في قراءة و فهم الرسائل؟  
Yes  نعم  لا  No  
Yes, please explain

**How did you find the daily SMS sending frequency?**

٧٩. كيف وجدت المعدل اليومي لاستلام الرسائل؟  
.....

**Did you think there was anything missing in the content of the messages?**

٨٠. في رأيك هل من شيء كانت تنقصه الرسائل؟  
.....

**No, why not?**

لا، لم لا؟

**Yes**

نعم

**Did you read the information booklet?**

٨١. هل قرأت كتيب المعلومات؟

**How was it? Was it clear and understandable?**

٨٢. كيف وجدته؟ هل كان محتواه واضح و مفهوم؟  
.....

**Booklet**

الكتيب

**SMSs**

الرسائل

**Would you prefer the booklet or the SMSs? Why?**

٨٣. هل تفضل الرسائل أم الكتيب و ما السبب؟

**No, why not?**

لا، لم لا؟

**Yes**

نعم

**Are you generally satisfied with the program?**<sup>9</sup>

٨٤. بشكل عام هل أنت راض عن البرنامج و خدماته؟<sup>9</sup>

**If it continues, would you stay enrolled with us?**<sup>9</sup>

٨٥. هل ستستمر معنا إن إستمر البرنامج؟<sup>9</sup>

لا، لم لا؟

نعم

**Would you recommend it to others?**<sup>9</sup>

٨٦. هل سترجح الإشتراك في البرنامج للآخرين؟<sup>9</sup>

لا، لم لا؟

نعم

**Do you think there's anything missing in the program?**

٨٧. في رأيك هل من شيء ينقصه البرنامج؟  
.....

**Do you think the program could improve the hospital's reputation?**

٨٨. هل تظن أن وجود البرنامج يحسن من سمعة

لا، لم لا؟

نعم

المستشفى؟

**Date**

التاريخ: .....

**Signature**

التوقيع: .....

**Superscripted questions are to rate the following:**

- <sup>1</sup> treatment adherence (using the diabetes self-care inventory)
- <sup>2</sup> rate of hospital/ER visits and stays
- <sup>3</sup> average frequency of blood glucose measurement
- <sup>4</sup> medication adherence (using Morisky scale)
- <sup>5</sup> diabetes knowledge
- <sup>6</sup> exercise
- <sup>7</sup> patient confidence (using diabetes empowerment scale short form and Stanford self-efficacy for diabetes)
- <sup>8</sup> patient confidence in healthcare provider
- <sup>9</sup> patient satisfaction
